# Supplementary material for: Suicide Prevention Programs Across U.S. Outpatient Mental Health Care Settings: Differences by Facility Ownership
Source: Atypon-hosted journal article supplement (doi:10.1176/appi.ps.202000203), 2021-03-04
Supplement: appi.ps.202000203.ds001.pdf [file appi.ps.202000203.ds001.pdf]

Appendix Table. Marginal differences in the predicted probabilities of suicide prevention program provisions by facility and community characteristics

| <b>Rurality of Facility Locations (Ref. Urban)</b>                                                    | <b>Facility Ownership</b> | <b>Marginal Differences (%)</b> | <b>95% CI</b>      | <b>p</b>        |
|-------------------------------------------------------------------------------------------------------|---------------------------|---------------------------------|--------------------|-----------------|
| Large Rural                                                                                           | Private For-Profit        | <b>11.01</b>                    | <b>.48–21.54</b>   | <b>.040</b>     |
|                                                                                                       | Private Non-Profit        | <b>10.83</b>                    | <b>5.93–15.72</b>  | <b>&lt;.001</b> |
|                                                                                                       | Public                    | <b>8.89</b>                     | <b>4.51–13.27</b>  | <b>&lt;.001</b> |
| Small Rural                                                                                           | Private For-Profit        | 11.75                           | -.59–24.09         | .062            |
|                                                                                                       | Private Non-Profit        | <b>18.32</b>                    | <b>12.97–23.67</b> | <b>&lt;.001</b> |
|                                                                                                       | Public                    | <b>9.35</b>                     | <b>4.64–14.06</b>  | <b>&lt;.001</b> |
| Isolated Rural                                                                                        | Private For-Profit        | 1.08                            | -20.56–22.72       | .922            |
|                                                                                                       | Private Non-Profit        | <b>20.12</b>                    | <b>12.71–27.54</b> | <b>&lt;.001</b> |
|                                                                                                       | Public                    | <b>8.76</b>                     | <b>2.15–15.37</b>  | <b>.009</b>     |
| <b>Facility Type (Ref. other mental health facility)</b>                                              |                           |                                 |                    |                 |
| Hospital Outpatient Settings                                                                          |                           | <b>15.67</b>                    | <b>11.85–19.49</b> | <b>&lt;.001</b> |
| Residential Programs                                                                                  |                           | -5.12                           | -14.39–4.15        | .323            |
| Community Mental Health Facility                                                                      |                           | <b>11.60</b>                    | <b>9.13–14.07</b>  | <b>&lt;.001</b> |
| <b>Payment Accepted (Ref. not accepting indicated payment type)</b>                                   |                           |                                 |                    |                 |
| Cash or Self-Payment                                                                                  |                           | <b>-4.27</b>                    | <b>-7.97–.56</b>   | <b>.027</b>     |
| Medicare                                                                                              |                           | <b>6.21</b>                     | <b>3.20–9.21</b>   | <b>&lt;.001</b> |
| Medicaid                                                                                              |                           | <b>-5.72</b>                    | <b>-9.67–1.76</b>  | <b>.006</b>     |
| Private Insurance                                                                                     |                           | 1.02                            | -2.48–4.53         | .566            |
| <b>Age Group Accepted for Treatment (Ref. not accepting indicated age group)</b>                      |                           |                                 |                    |                 |
| Children/Adolescents (Age ≤17)                                                                        |                           | 1.13                            | -1.61–3.88         | .418            |
| Young Adults (18-25)                                                                                  |                           | <b>16.82</b>                    | <b>11.02–22.63</b> | <b>&lt;.001</b> |
| Adults (26-64)                                                                                        |                           | -2.09                           | -6.62–2.44         | .370            |
| Senior (65+)                                                                                          |                           | <b>7.55</b>                     | <b>5.02–10.08</b>  | <b>&lt;.001</b> |
| <b>Proportion of Residents Who Are:</b>                                                               |                           |                                 |                    |                 |
| Males vs. Females                                                                                     |                           | .22                             | -.12–.57           | .206            |
| <b>Proportion of Residents Who Are White (Ref. quartile 1, &lt;61.5%)</b>                             |                           |                                 |                    |                 |
| Quartile 2 (61.5%-80.8%)                                                                              |                           | 2.96                            | -.27–6.19          | .072            |
| Quartile 3 (80.9%-91.5%)                                                                              |                           | <b>3.73</b>                     | <b>.09–7.37</b>    | <b>.044</b>     |
| Quartile 4 (91.6%-100%)                                                                               |                           | 2.07                            | -2.18–6.32         | .340            |
| <b>Proportion of Residents Who Are American Indian or Alaska Natives (Ref. quartile 1, &lt;11.4%)</b> |                           |                                 |                    |                 |
| Quartile 2 (11.4%-30.4%)                                                                              |                           | <b>3.92</b>                     | <b>.91–6.93</b>    | <b>.011</b>     |
| Quartile 3 (30.5%-70.7%)                                                                              |                           | <b>3.34</b>                     | <b>.22–6.45</b>    | <b>.036</b>     |
| Quartile 4 (70.8%-96.6%)                                                                              |                           | <b>4.15</b>                     | <b>.47–7.83</b>    | <b>.027</b>     |
| <b>Population below 200% Federal Poverty Level</b>                                                    |                           | <b>1.00</b>                     | <b>.12–1.88</b>    | <b>.025</b>     |

<sup>a</sup> The 95% confidence intervals (CI) were calculated using delta methods with state-level clustering to adjust for correlated random variances in service provision across facilities in the same state; spatial autocorrelations adjusted for clustering service provisions.
